# Supplementary material
Source: Royal Society of Chemistry journal article supplement (doi:10.1039/d6ta01685e)
Supplement: d6ta01685e1.pdf [file d6ta01685e1.pdf]

## Supporting Information

### Metal-Organic Framework on Fullerene (MOFOF) Derived Co-anchored Hierarchical Carbon Nanocomposite for Catalytic Nitroarene Reduction

Biswa Nath Bhadra,<sup>\*ab</sup> Rabindra Nath Acharyya,<sup>ac#</sup> Sabina Shahi,<sup>ac#</sup> Katsuhiko Ariga<sup>\*ad</sup> and Lok Kumar Shrestha <sup>\*ae</sup>

---

<sup>a</sup> Research Center for Materials Nanoarchitectonics (MANA), National Institute for Materials Science (NIMS), 1-1 Namiki, Tsukuba, Ibaraki 305-0044, Japan  
Email: SHRESTHA.Lokkumar@nims.go.jp

<sup>b</sup> Institute Charles Gerhardt Montpellier (ICGM), Centre national de la recherche scientifique (CNRS), Montpellier, 34095, France

<sup>c</sup> Graduate School of Science and Technology, University of Tsukuba, 1-1-1 Tennodai, Tsukuba, Ibaraki 305-8573, Japan

<sup>d</sup> Department of Advanced Materials Science, Graduate School of Frontier Sciences, The University of Tokyo, 5-1-5 Kashiwanoha, Kashiwa, Chiba 277-8561, Japan

<sup>e</sup> Department of Materials Science, Institute of Pure and Applied Sciences, University of Tsukuba, 1-1-1 Tennodai, Tsukuba, Ibaraki 305-8573, Japan

# These authors contributed equally

\*Corresponding authors

bbhadra1981@gmail.com (Biswa Nath Bhadra)

ARIGA.Katsuhiko@nims.go.jp (Katsuhiko Ariga)

SHRESTHA.Lokkumar@nims.go.jp (Lok Kumar Shrestha)

## 1. Materials

All chemicals used in this study were sourced from commercial suppliers and utilized without further purification. Pristine fullerene C<sub>60</sub> (pC<sub>60</sub>: 99.9%) was obtained from BBS Chemicals, USA. Methanol (99.7%), triethylamine (TEA), mesitylene (C<sub>9</sub>H<sub>12</sub>: 99.8%), nitric acid (HNO<sub>3</sub>: 65%), sulfuric acid (H<sub>2</sub>SO<sub>4</sub>: 98%), were purchased from Wako Chemical Corporation, Tokyo, Japan. Cobalt nitrate hexahydrate (Co(NO<sub>3</sub>)<sub>2</sub>·6H<sub>2</sub>O: 99%), methylimidazole (Mim: 99.8%) para nitrophenol (C<sub>6</sub>H<sub>5</sub>NO<sub>3</sub>: 98%), nitrobenzene (C<sub>6</sub>H<sub>5</sub>NO<sub>2</sub>: 98%), ortho-nitrophenol (C<sub>6</sub>H<sub>5</sub>NO<sub>3</sub>: 98%), para-methyl nitrobenzene (C<sub>7</sub>H<sub>7</sub>NO<sub>2</sub>: 98%), para-chloro nitrobenzene (C<sub>6</sub>H<sub>4</sub>ClNO<sub>2</sub>: 99%) and sodium borohydride (NaBH<sub>4</sub>: 98%) were acquired from Tokyo Chemical Industry Co., Ltd., Japan.

## 2. Experimental

### 2.1 Synthesis and carbonization of MOFOF

The synthesis of MOF-on-fullerene composites (MOFOFs) followed methods similar to our recent work.<sup>1</sup> The FNT crystals were first prepared using the liquid-liquid interphase precipitation (LLIP) method, with mesitylene as the good solvent and methanol as the poor solvent. A solution of pristine C<sub>60</sub> (pC<sub>60</sub>) in mesitylene (1.0 mg/mL) was sonicated for 1 hour and filtered to remove undissolved particles. To induce FNT crystallization, methanol (90 mL) was rapidly added to the pC<sub>60</sub> solution (30 mL) and hand-shaken for 5 seconds. The resulting precipitates, after undisturbed incubation at 25 °C for 2 hours, were collected by centrifugation, washed with methanol, and dried under vacuum at 80 °C for 6 hours. The dried FNT was oxidized by immersing 100 mg of FNT in a 1:1 mixture of concentrated HNO<sub>3</sub> and H<sub>2</sub>SO<sub>4</sub> (10 mL) followed by sonication for 20 minutes. The oxidized FNT (FNT<sub>ox</sub>) was then centrifuged, washed with water until the pH was neutral, and dried under vacuum at 80 °C for 12 hours.

The MOFOF composites were obtained via in-situ growth of ZIF-67 onto FNT<sub>ox</sub> under sonication. Co(NO<sub>3</sub>)<sub>2</sub>·6H<sub>2</sub>O (2 mM, 10 mL) and a ligand-modulator mixture of methylimidazole (Mim) and triethylamine (TEA) (16 mM, 10 mL) were dissolved in water. The Co<sup>2+</sup> solution was added to a dispersion of FNT<sub>ox</sub> (100 mg/mL) and sonicated for 5 minutes with periodic hand-shaking. The Mim and TEA solution was then added, and sonication/hand-shaking was continued for an additional 15 minutes. The resulting MOFOF solids were collected by centrifugation, washed with water and methanol, and dried under vacuum at 80 °C for 12 hours. MOFOF composites with different FNT<sub>ox</sub>/MOF or C<sub>60</sub>/Co<sup>2+</sup> ratios (0.5, 1.0, 1.5, 2.0) were labeled MOFOF-0.5, MOFOF-1.0, MOFOF-1.5, and MOFOF-2.0, respectively.

The dried FNT<sub>ox</sub>, pZIF-67, MOFOF-0.5, MOFOF-1.0, MOFOF-1.5, and MOFOF-2.0 samples were subjected to carbonization at 800 °C in a tube furnace under an inert nitrogen atmosphere to produce hierarchically porous carbon nanocomposites. The carbonization process involved a heating ramp of 10 °C/min, a hold time of 4 hours, and a nitrogen gas flow rate of 120 cc/min. The resulting carbonized products were labelled as FDC, Co@ZDC, Co@HC-0.5, Co@HC-1.0, Co@HC-1.5, and Co@HC-2.0, respectively.

### 2.2 Characterisations

The synthesized MOFOF composites and carbon nanocomposites were characterized using a range of analytical techniques, including scanning electron microscopy (SEM, 10 kV, Hitachi S-4800, Tokyo, Japan), scanning transmission electron microscopy (STEM, 30 kV, Hitachi S-4800, Tokyo, Japan), powder X-ray diffraction (PXRD, 40 kV, Cu-K $\alpha$  radiation,  $\lambda$  = 0.1541 nm, RINT2000 diffractometer, Rigaku, Tokyo, Japan), Raman spectroscopy (NRS-3100 Raman spectrometer, JASCO, Tokyo, Japan), and X-ray photoelectron spectroscopy (XPS; Thermo Electron Co., Karlsruhe, Germany, with monochromatic Al-K $\alpha$  radiation at 15 keV). Nitrogen adsorption-desorption measurements were conducted using a Quantachrome Instrument Autosorb-1 (USA). Samples for electron microscopy were prepared by depositing a suspension of the materials in isopropyl alcohol onto carbon-coated copper grids and drying them under vacuum at 70 °C.

### 2.2 Evaluation of catalytic activities

The catalytic reduction of nitroarenes was measured using a Shimadzu UV2550 spectrophotometer in a 4 mL quartz cell. Typically, a freshly prepared aqueous NaBH<sub>4</sub> solution (2.5 mL, 0.05 M) was mixed with an aqueous nitroarene solution (25  $\mu$ L, 10 mM) in the quartz cell, resulting in a colour change from light yellow to yellow-green. Then, a suspension of the catalysts Co@HCs, FDC, or Co@ZDC (20  $\mu$ L, 1 mg/mL) was added to the mixture. The reduction process was monitored by recording the UV-Vis absorbance at 400 nm at 1-minute intervals.<sup>2,3</sup>

**Recycling of catalysts.** To assess catalyst recyclability, the performance of Co@HC-1.0 in 4-NP reduction was evaluated after regeneration. After each catalytic reaction, the Co@HC-1.0 catalyst was separated from the reaction mixture using a magnet, thoroughly washed with ethanol, and dried under vacuum at 100 °C overnight for subsequent reuse.

### 3. Additional data

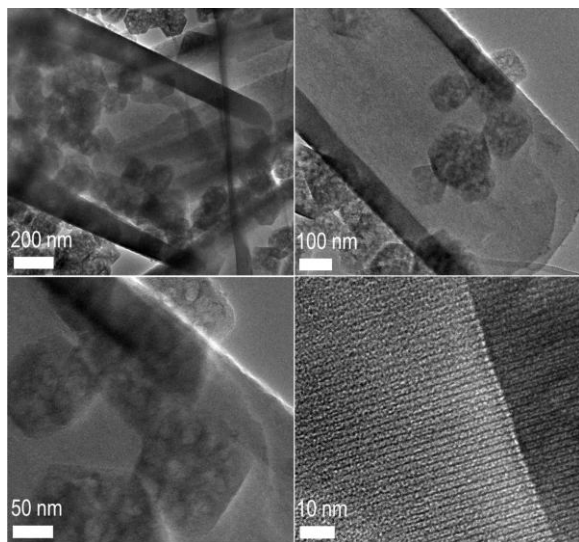

**Fig. S1.** TEM images of MOFOF-1.0.

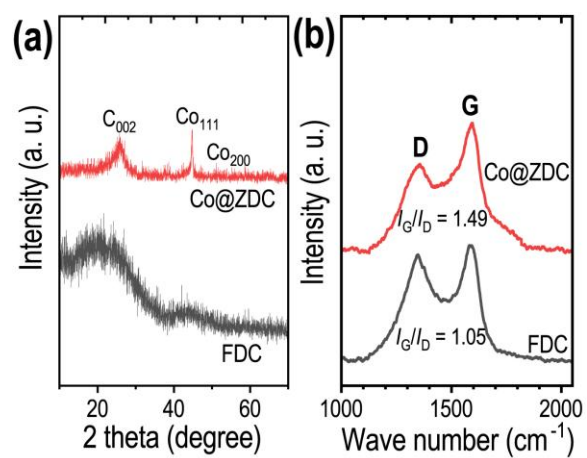

**Fig. S2.** (a) XRD patterns and Raman spectrum of FDC (FNT<sub>ox</sub>-derived carbon) and Co@ZDC (ZIF-67-derived Co@carbon) materials.

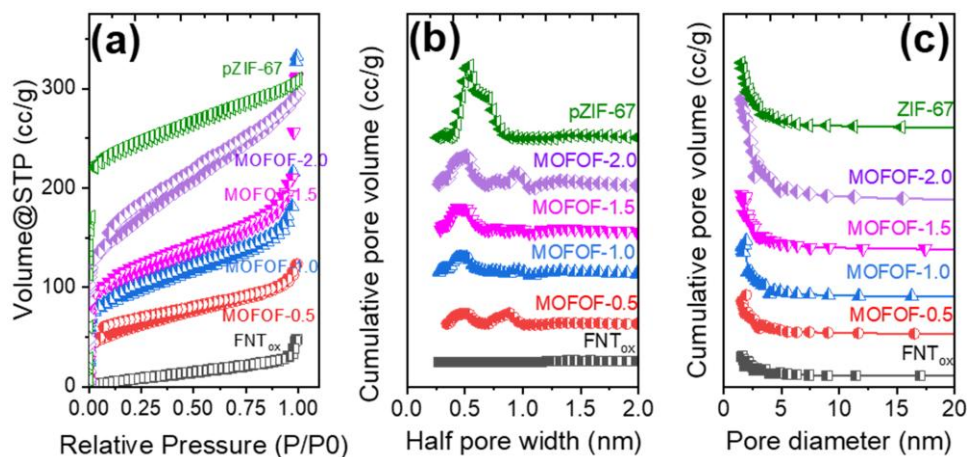

**Fig. S3.** (a) Nitrogen adsorption-desorption isotherms of the FNT<sub>ox</sub>, MOFOF, and pZIF-67 samples, pore size distribution curves using (b) the DFT method and (c) the BJH method.

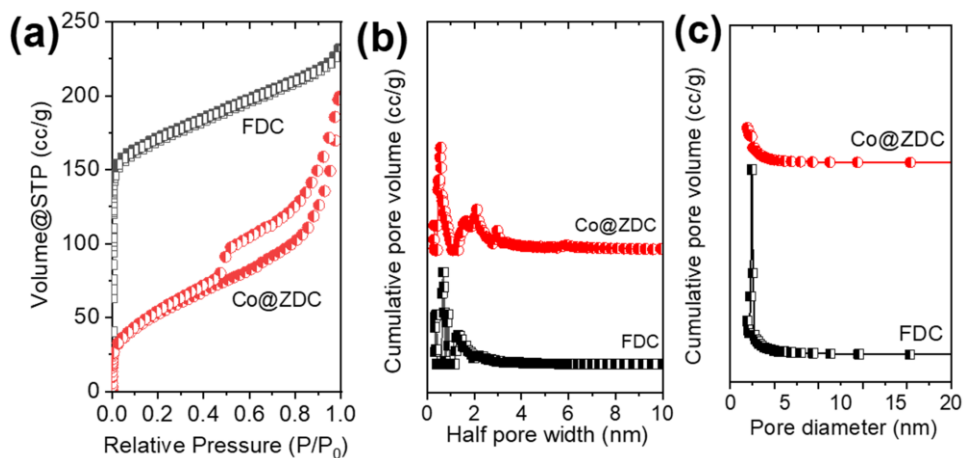

**Fig. S4.** (a) Nitrogen adsorption-desorption isotherms of the FDC and Co@ZDC samples, pore size distribution curves using (b) the DFT method and (c) the BJH method.

**Table S1:** Comparative analysis of the catalytic efficiency of Co@HCs versus reported Co-based and remarkable reported catalysts in the reduction of 4-NP using NaBH<sub>4</sub>.

| Entry | Catalyst                               | K (min <sup>-1</sup> )  | TOF (h <sup>-1</sup> ) | Reference  |
|-------|----------------------------------------|-------------------------|------------------------|------------|
| 1     | Co@HC-0.5                              | 1.63×10 <sup>-1</sup>   | 231                    | This study |
| 2     | Co@HC-1.0                              | 9.25×10 <sup>-1</sup>   | 486                    |            |
| 3     | Co@HC-1.5                              | 4.16×10 <sup>-1</sup>   | 285                    |            |
| 4     | Co@HC-2.0                              | 3.09×10 <sup>-1</sup>   | 142                    |            |
| 5     | Co@ZDC                                 | 7.24×10 <sup>-1</sup>   | 55                     |            |
| 6     | MDC-6(75Zn25Co)-900                    | 3.8 × 10 <sup>-1</sup>  | 325                    | 4          |
| 7     | Co/AC                                  | 1.1 × 10 <sup>-1</sup>  | 42                     |            |
| 8     | Co/rGO                                 | 1.6 × 10 <sup>-1</sup>  | 93                     |            |
| 9     | Co@NC                                  | 1.02 × 10 <sup>-1</sup> | 45                     | 5          |
| 10    | N-Co@C-800-3                           | 3.5 × 10 <sup>0</sup>   | –                      | 6          |
| 11    | Co-NCC                                 | 2.82 × 10 <sup>0</sup>  | –                      | 7          |
| 12    | Co-Ni-rGO                              | 1.14 × 10 <sup>0</sup>  | –                      | 8          |
| 13    | Co@BrNC                                | 8.82 × 10 <sup>-1</sup> | –                      | 9          |
| 14    | Co@CN/CM                               | –                       | 2556                   | 10         |
| 15    | C@Co                                   | 2.52 × 10 <sup>0</sup>  | 0.17                   | 11         |
| 16    | Co-W-P/CC                              | 7.14 × 10 <sup>-1</sup> | –                      | 12         |
| 17    | Co@SiO <sub>2</sub>                    | 8.2 × 10 <sup>-1</sup>  | –                      | 13         |
| 18    | reduced Co <sub>3</sub> O <sub>4</sub> | 14.9 × 10 <sup>-1</sup> | –                      | 14         |
| 19    | ZnCo <sub>2</sub> O <sub>4</sub>       | 1.02 × 10 <sup>0</sup>  | –                      | 15         |
| 20    | Co/ZnO/N-C                             | 4.2 × 10 <sup>-2</sup>  | –                      | 16         |
| 21    | Co-NB                                  | 5.4 × 10 <sup>-2</sup>  | –                      | 17         |
| 22    | Co <sub>1</sub> /NC-800                | 1.28 × 10 <sup>0</sup>  | 73668                  | 18         |
| 23    | Co-N <sub>4</sub> /TiN-rGO             | 1.20 × 10 <sup>0</sup>  | 300                    | 19         |
| 24    | Co <sub>3</sub> O <sub>4</sub> /HNTs   | 2.7 × 10 <sup>-1</sup>  | 264                    | 20         |
| 25    | Cu/Co@NCF-15                           | 4.16 × 10 <sup>0</sup>  | 438                    | 21         |
| 26    | Rh@ZrO <sub>2</sub> /NC                | –                       | 2136                   | 22         |
| 27    | PtNiCo/C                               | –                       | 2616                   | 23         |
| 28    | Pt-PMo@UiO-66                          | –                       | 1498                   | 24         |
| 29    | Ni-SiW POMOF                           | –                       | 255.5                  | 25         |

<sup>a</sup>Co-content was analyzed by EDS analysis; <sup>b</sup>Relative k was estimated by considering the k of FDC as 1; <sup>c</sup>relative Co@ZDC

## References

- 1 B. N. Bhadra, L. K. Shrestha, R. Ma, J. P. Hill, Y. Yamauchi and K. Ariga, *ACS Appl. Mater. Interfaces*, 2024, **16**, 41363–41370.
- 2 B. N. Bhadra and S. H. Jung, *Nanoscale*, 2018, **10**, 15035–15047.
- 3 X. Li, C. Zeng, J. Jiang and L. Ai, *J. Mater. Chem. A*, 2016, **4**, 7476–7482.
- 4 B. N. Bhadra, N. A. Khan and S. H. Jung, *J. Mater. Chem. A*, 2019, **7**, 17823–17833.
- 5 X. Li, C. Zeng, J. Jiang and L. Ai, *J. Mater. Chem. A*, 2016, **4**, 7476–7482.
- 6 H. Zhao and L. Zhao, *Dalton Trans.*, 2018, **47**, 3321–3328.
- 7 Z. Hasan, D. W. Cho, C. M. Chon, K. Yoon and H. Song, *Chem. Eng. J.*, 2016, **298**, 183–190.
- 8 R. Prasad, M. K. Lolakshi and B. R. Bhat, *Synth. Met.*, 2016, **219**, 26–32.
- 9 D. Wang, Q. Wu, H. Qi, L. Tan, A. Yu and T. He, *Inorg. Chem. Commun.*, 2025, **182**, 115430.
- 10 Q. Chen, H. Jiang and R. Chen, *Chem. Eng. Sci.*, 2022, **248**, 117160.
- 11 M. A. Ahsan, O. Fernandez-Delgado, E. Deemer, H. Wang, A. A. El-Gendy, M. L. Curry and J. C. Noveron, *J. Mol. Liq.*, 2019, **290**, 111059.

- 12 Y. Wei, X. Huang, J. Wang, H. Yu, X. Zhao and D. Cheng, *Int. J. Hydrogen Energy*, 2017, **42**, 25860–25868.
- 13 N. Yan, Z. Zhao, Y. Li, F. Wang, H. Zhong and Q. Chen, *Inorg. Chem.*, 2014, **53**, 9073–9079.
- 14 H. Chen, M. Yang, S. Tao and G. Chen, *Appl. Catal. B Environ.*, 2017, **209**, 648–656.
- 15 M. Lu, C. Gong, T. Lu, F. Dong, F. Dong, L. Ma and W. Yu, *Ind. Eng. Chem. Res.*, 2026, **65**, 291–299.
- 16 S. Li, X. Zhang, L. Bai and H. Yu, *J. Sol-Gel Sci. Technol.*, 2021, **99**, 101–108.
- 17 D. W. Cho, K. H. Jeong, S. Kim, D. C. W. Tsang, Y. S. Ok and H. Song, *Sci. Total Environ.*, 2018, **612**, 103–110.
- 18 F. Cao, Q. Zhao, X. Tan, Q. Xu, L. Wang, B. Zhu, Y. Yan, D. Kong, L. Zhi and M. Wu, *Adv. Funct. Mater.*, 2025, **35**, 2423398.
- 19 Y. Long, Y. Huang, X. Shi and L. Xiao, *J. Mater. Chem. A Mater.*, 2018, **6**, 18561–18570.
- 20 M. Zhang, X. Su, L. Ma, A. Khan, L. Wang, J. Wang, A. S. Maloletnev and C. Yang, *J. Hazard. Mater.*, 2021, **403**, 123870.
- 21 C. Chu, S. Rao, Z. Ma and H. Han, *Appl. Catal. B Environ.*, 2019, **256**, 117792.
- 22 L. Ruan, X. Han, L. Zhu, C. Shang, A. Kroner, K. Liu, Y. Zhang, B. H. Chen, Z. Guo, *Appl. Catal. B Environ.*, 2025, **379**, 125686.
- 23 L. Zhu, H. Zhang, H. Zhu, H. Fu, A. Kroner, Z. Yang, H. Ye, B. H. Chen, R. Luque, *J. Catal.*, 2022, **413**, 978–991.
- 24 K. Chen, Q. Liu, Z. Qiu, H. Zhang, N. Gong, L. Zhu, *J. Mater. Chem. A*, 2024, **12**, 23940-23947.
- 25 Q. Liu, Y. Zhong, H. Fu, R. Wang, L. Zhu, *Appl. Catal. A: Gen.*, 2023, **665**, 119373.
